# Supplementary material for: Induction of the Inflammasome Pathway by Tyrosine Kinase Inhibitors Provides an Actionable Therapeutic Target for Hepatocellular Carcinoma
Source: MDPI journal article supplement (doi:10.3390/cancers16081491), 2024-04-13
Supplement: s1 [file s1]

## MALE

## FEMALE

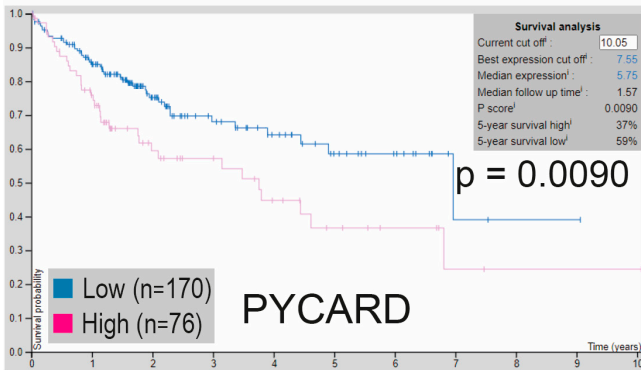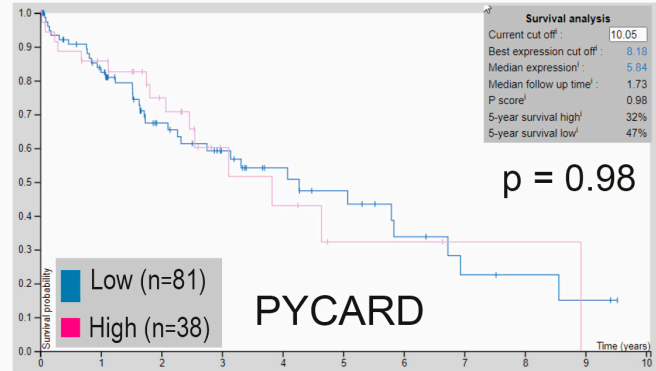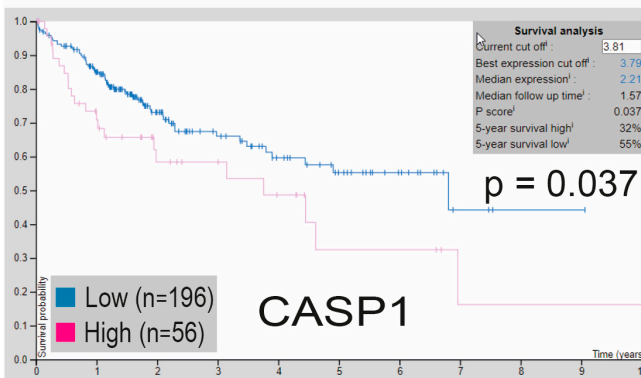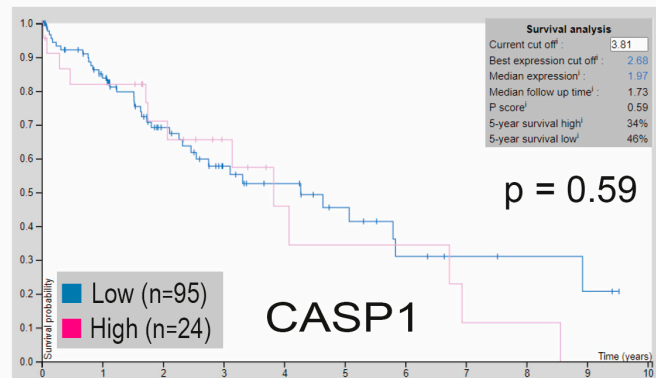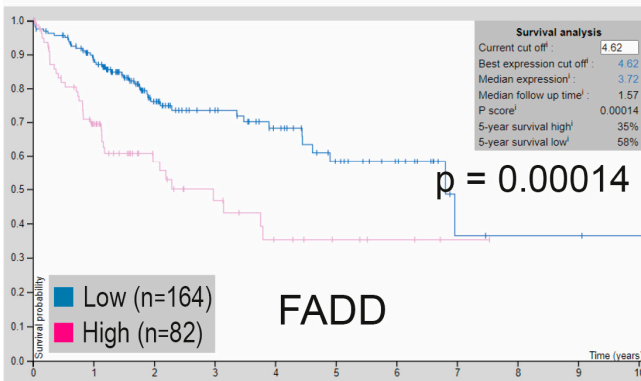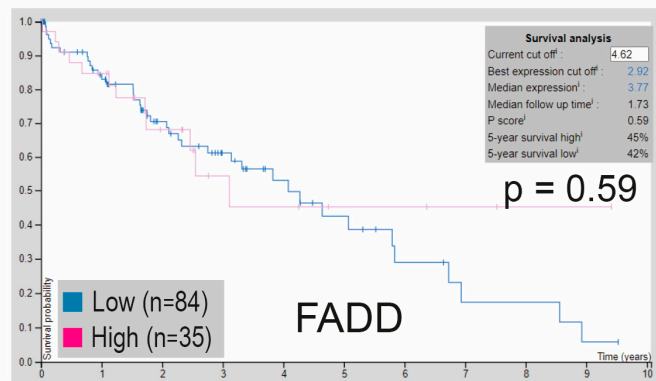

**Supplemental Figure S1.** Enhanced images representing the survival probability of HCC patients depending on gene expression of inflammasome-related genes.

## MALE

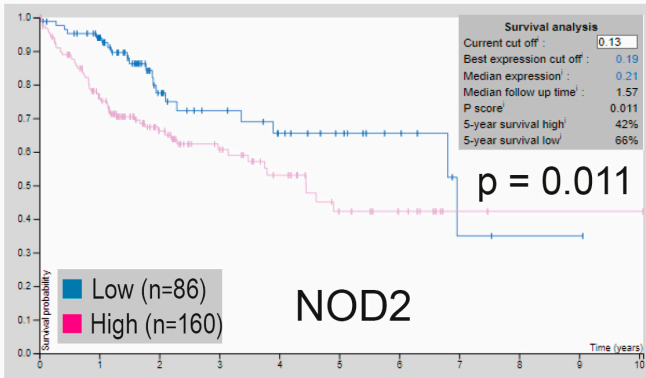

## FEMALE

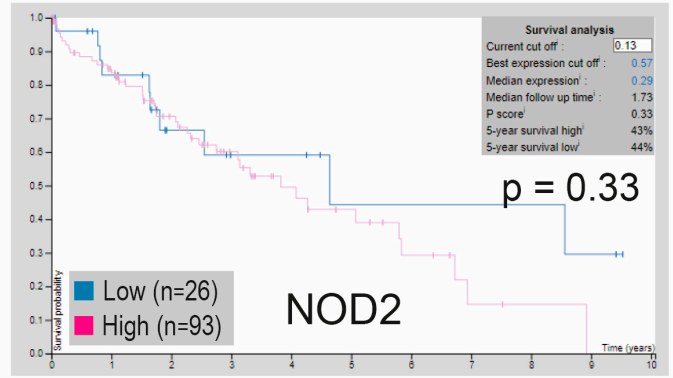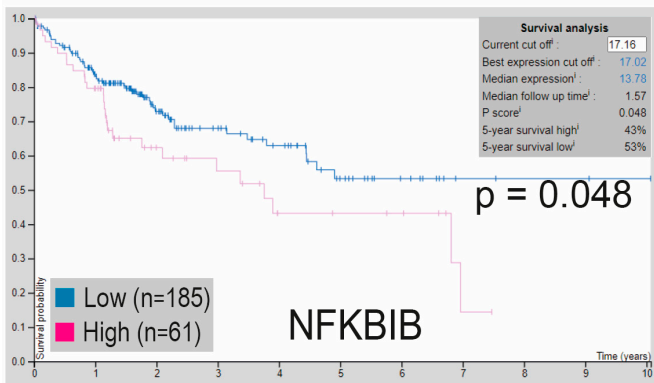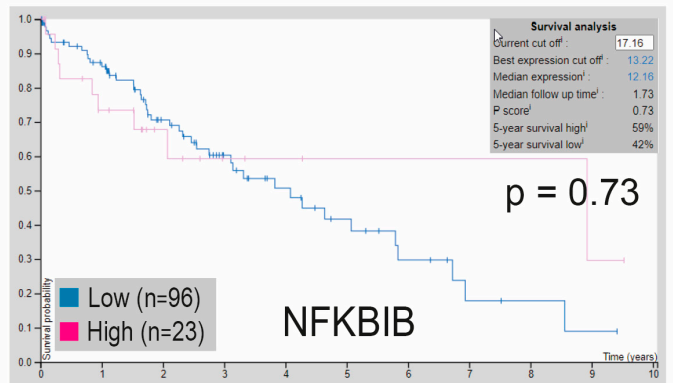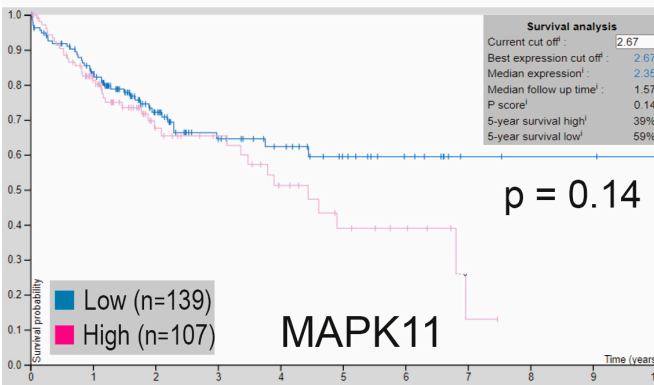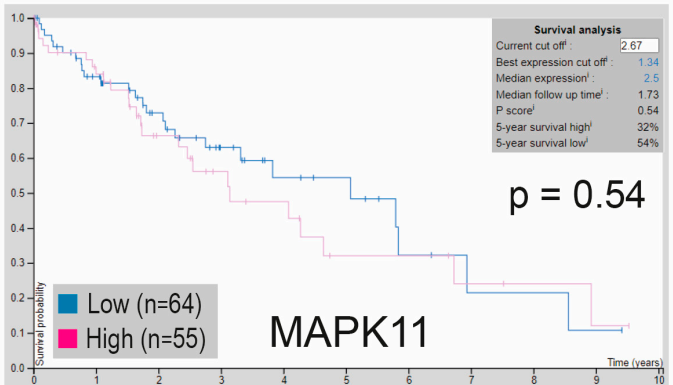

**Supplemental Figure S2.** Enhanced images representing the survival probability of HCC patients depending on gene expression of inflammasome-related genes.

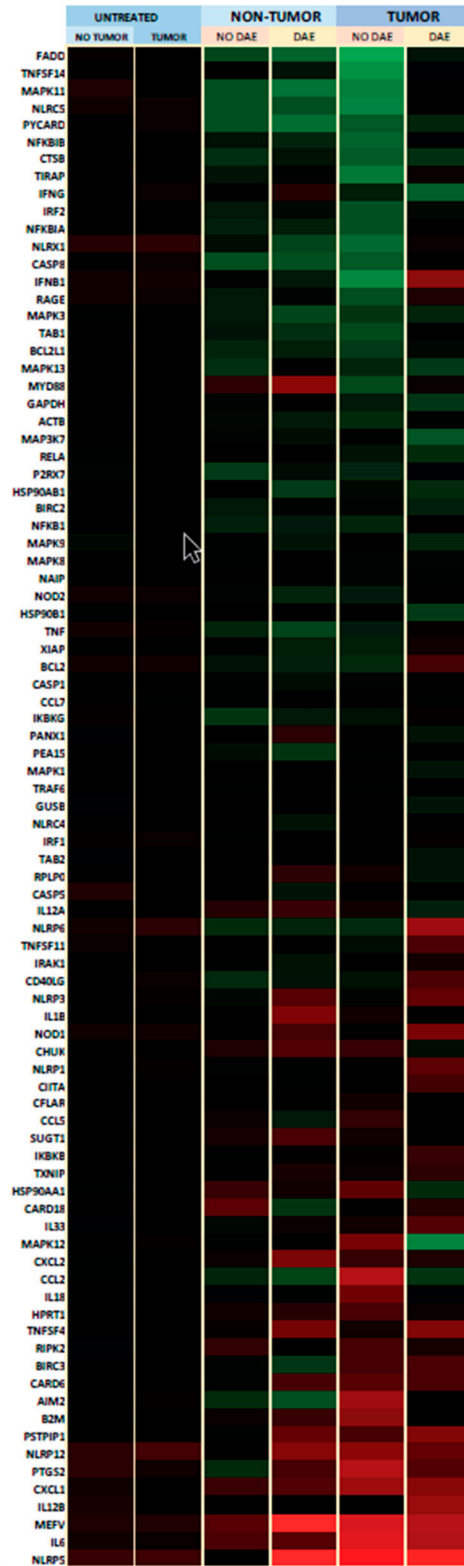

**Supplemental Figure S3.** DAE occurrence is not positively related to increased transcriptomic changes in inflammasome-related genes in liver or HCC samples of sorafenib/regorafenib-treated patients. cDNAs obtained from HCC tumor and adjacent tissue biopsied from patients untreated or under sorafenib/regorafenib were analyzed using a microarray for mRNA expression of inflammasome-related genes. Heat map average representation of tumor and non-tumor samples from untreated patients (n = 10) or after sorafenib/regorafenib administration exhibiting DAE (n = 3) or not (n = 7).

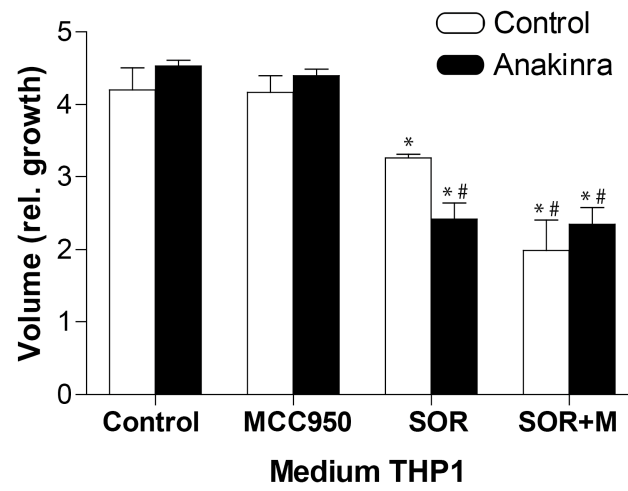

**Supplemental Figure S4.** Growth of Hep3B tumoroids treated with THP-1 conditioned medium after sorafenib (10  $\mu$ M) and MCC950 (1  $\mu$ M) administration and with THP-1 conditioned medium after sorafenib (10  $\mu$ M) and Anakinra (0.5  $\mu$ g/mL) for 7 days. \*  $p < 0.05$  vs. CTRL tumoroids. #  $p < 0.05$  vs. sorafenib-treated tumoroids.

**Supplemental Table S1.** Data from HCC patients (untreated, n = 10, and sorafenib/regorafenib treated, n = 10) included in this study. M: male, F: female; HCV: hepatitis C virus; HBV: hepatitis B virus; MASH: metabolic dysfunction associated steatohepatitis; DAE: dermatologic adverse events; BCLC: Barcelona Clinic Liver Cancer.

| Sample       | Treatment   | Sex | Age | Etiology            | DAE | BCLC     | Child-Pugh | Ascites | Survival (days) |
|--------------|-------------|-----|-----|---------------------|-----|----------|------------|---------|-----------------|
| Untreated-1  | Untreated   | M   | 54  | HCV                 | NA  | BCLCp-C2 | A          | NO      | NA              |
| Untreated-2  | Untreated   | M   | 62  | HCV-Alcohol         | NA  | BCLCp-C2 | A          | NO      | NA              |
| Untreated-3  | Untreated   | M   | 58  | HCV                 | NA  | BCLCp-C1 | A          | NO      | NA              |
| Untreated-5  | Untreated   | M   | 40  | HBV                 | NA  | BCLCp-B  | A          | NO      | NA              |
| Untreated-6  | Untreated   | M   | 65  | MASH                | NA  | BCLCp-C2 | A          | NO      | NA              |
| Untreated-7  | Untreated   | M   | 82  | HCV                 | NA  |          | A          | NO      | NA              |
| Untreated-8  | Untreated   | M   | 69  | NASH                | NA  | BCLCp-C1 |            | NO      | NA              |
| Untreated-8  | Untreated   | M   | 84  | HCV-Hemochromatosis | NA  |          | A          | NO      | NA              |
| Untreated-9  | Untreated   | M   | 66  | MASH - Alcohol      | NA  | BCLCp-C2 | A          | NO      | NA              |
| Untreated-10 | Untreated   | M   | 71  | Alcohol             | NA  | BCLCp-C2 | A          | NO      | NA              |
| Treated-1    | Regorafenib | M   | 74  | HBV                 | NO  | BCLCp-C2 | A          | NO      | 902             |
| Treated-2    | Regorafenib | M   | 67  | Alcohol             | NO  | BCLCp-C1 | A          | YES     | 1346            |
| Treated-3    | Sorafenib   | M   | 73  | NASH                | NO  | BCLCp-C2 | A          | NO      | 797             |
| Treated-4    | Sorafenib   | M   | 59  | HCV                 | NO  | No PD    | A          | NO      | 3216            |
| Treated-5    | Regorafenib | M   | 61  | HCV                 | NO  |          | A          | NO      | 400             |
| Treated-6    | Sorafenib   | M   | 62  | HBV-Alcohol         | NO  | BCLCp-C2 | A          | NO      | 912             |
| Treated-7    | Regorafenib | M   | 61  | HCV-Alcohol         | NO  | BCLCp-B  | A          | NO      | 891             |
| Treated-8    | Sorafenib   | M   | 56  | HCV-Alcohol         | YES | BCLCp-B  | A          | NO      | 670             |
| Treated-9    | Sorafenib   | M   | 61  | MASH                | YES | BCLCp-B  | A          | NO      | 1103            |
| Treated-10   | Regorafenib | F   | 68  | HCV                 | YES | BCLCp-C1 | A          | NO      | 612             |
